# Supplementary material
Source: PubMed Central journal article supplement (PMC4675465)
Supplement: NIHMS731760-supplement-Supplemental.pdf [file NIHMS731760-supplement-Supplemental.pdf]

## Frataxin accelerates [2Fe-2S] cluster formation on the human Fe-S assembly complex

Nicholas G. Fox, Deepika Das, Mrinmoy Chakrabarti, Paul A. Lindahl, and David P. Barondeau

### Supporting Information

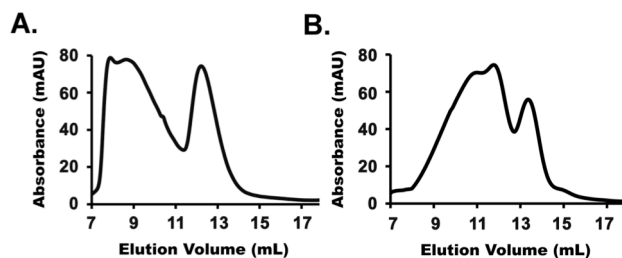

**Figure S1.** Elution profile of Fe-S assembly reaction solutions showing that cysteine desulfurase generates HMWS during Fe-S assembly reactions under scaled up Standard conditions. Reaction mixtures including (A) human SD or (B) *E. coli* IscS and DTT, Fe<sup>2+</sup>, and L-cysteine were incubated for 45 min at 12 °C. The samples were then separately applied to an anaerobic S-200 column and monitored by absorbance at 280 nm. The HMWS and cysteine desulfurase elute in fractions 8-12, and 12-14, respectively.

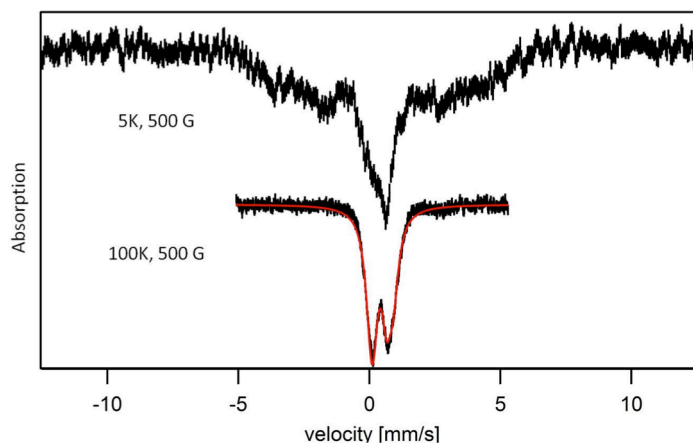

**Figure S2.** Mössbauer spectra for HMWS generated from SD sample. A 600  $\mu$ M SD sample was reacted with 5 mM Fe<sup>2+</sup>, 5 mM L-cysteine, and 18 mM DTT for 60 min. The HMWS was isolated on a S200 column. Mössbauer conditions listed in figure. The red line represents a simulation of the 100 K data.
